# Supplementary material
Source: PubMed Central journal article supplement (PMC2351957)
Supplement: NIHMS42488-supplement-01.pdf [file NIHMS42488-supplement-01.pdf]

Supplemental Data

Rad52 Promotes Postinvasion Steps  
of Meiotic Double-Strand-Break Repair

Jessica Lao, Steve Oh, Miki Shinohara, Akira Shinohara and Neil Hunter.

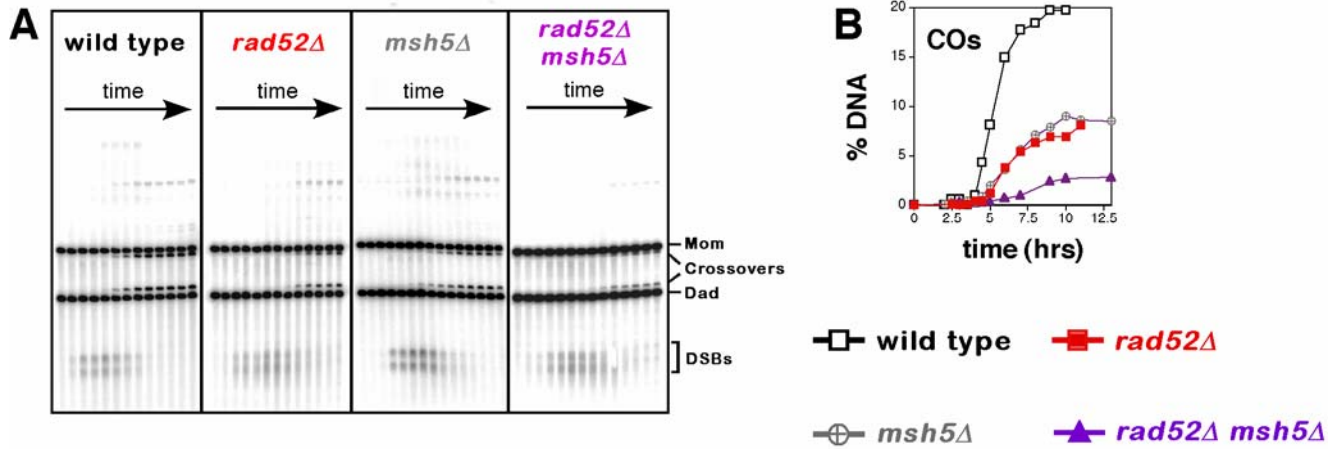

Figure S1. Crossovers in *rad52Δ* Mutants Are Promoted by the Pro-Crossover Factor, Msh5.

(A). Images of 1D gels from wild-type, *rad52Δ*, *msh5Δ* and *rad52Δ msh5Δ* time course experiments.

(B) Quantitation of crossovers (COs) in wild-type *rad52Δ*, *msh5Δ* and *rad52Δ msh5Δ* strains.

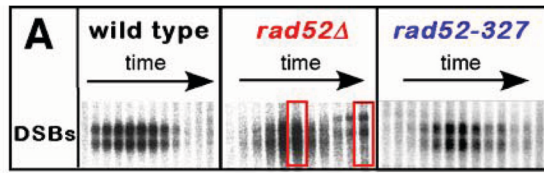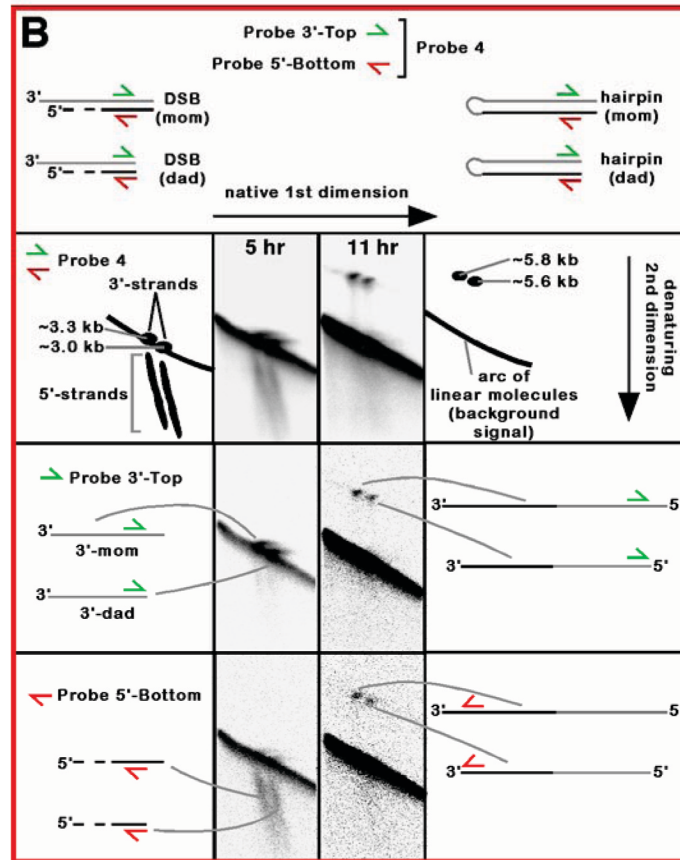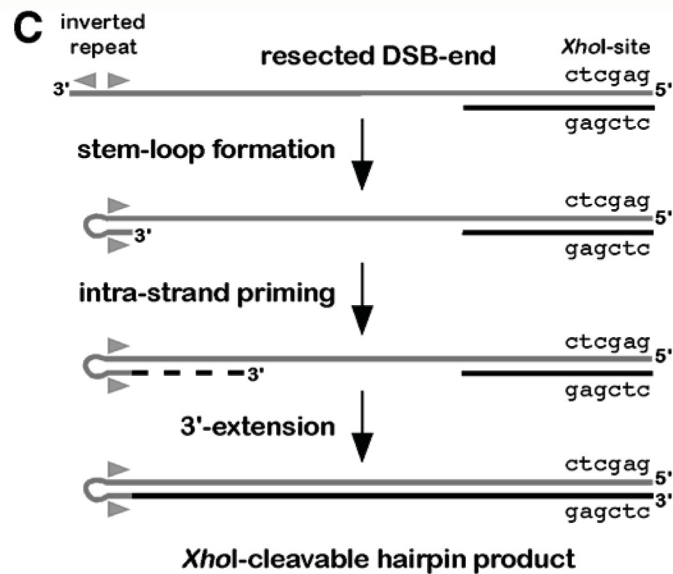

**Figure S2. Strand Analysis of Late-Forming “DSB” Species in *rad52*Δ Cells.**

(A) Dark exposures of the DSB regions from 1D gels (taken from Figure 2C). Red boxes highlight the 5 hr and 11 hr *rad52*Δ samples analyzed below in (B).

(B) Component strands of DSB signals from *rad52*Δ cells were examined using native/denaturing electrophoresis in which psoralen cross-links are removed prior to running a second dimension gel under denaturing conditions (Hunter and Kleckner, 2001).

First Row: Blots were successively hybridized with a probe that recognizes both strands of the DSB-ends (Probe 4 in Figure 1) and with strand-specific probes. Structures of normal DSB-ends and the proposed hairpin-ends under native conditions are shown.

Second Row: Analysis of DSBs from a 5 hr sample (when DSBs peak in *rad52*Δ cells) with Probe 4, reveals the expected composition of discrete signals that migrate on the arc of linear molecules, and smeared variable-length signals that migrate below the arc; these correspond, respectively, to the stable 3'-strands and variably resected 5'-strands of processed DSBs (Hunter and Kleckner, 2001). In contrast, the late-forming species, sampled at 11 hrs, produce only discrete hybridizing signals corresponding to single long strands of DNA. Under native conditions, however, these species are liberated by *Xho*I digestion, implying that double-stranded DNA is present at one or more *Xho*I recognition sites. In the second denaturing dimension, the two hybridizing species migrate above the arc of linears at positions corresponding to approximately 5.6 and 5.8 kb of single-stranded DNA. Sizes were estimated from three independent experiments by comparison to a ladder of known molecular weight markers using ImageQuant Version 5.0 software (Molecular Dynamics).

Third Row: Probe 3'-Top specifically hybridizes to the unresected 3'-strands of the DSBs in the 5 hr sample. This probe also recognizes the late-forming species in the 11 hr sample.

Fourth Row: Probe 5'-Bottom recognizes the variably resected 5'-strands of DSBs in the 5 hr sample and also hybridizes to the larger species from the 11 hr sample. The two strand-specific probes produce the same relative signal intensities for the late forming species indicating that these molecules contain equal numbers of 3'-5' and 5'-3' sequences.

C. Stem-loop model of hairpin formation at *HIS4LEU2* DSB-ends. The size and strand-composition of the late-forming species are consistent with a hairpin structure resulting from stem-loop formation and intramolecular priming within the 3'-strand of a DSB-end.

Sequence motifs with potential to form stem-loop structures in the 3'-strands of DSB-ends to the right of the *HIS4LEU2* DSB-site were identified using the stem-loop module of the GCG package (Accelrys, Software Inc.). The central *Bam*HI/*Ngo*MIV polymorphism, which marks the major DSB site (Figure 1), is at position 2958 (represented by a lower-case "t" in the sequences). All seven hairpin-loop motifs are within 0.5 kb of the DSB site. The first five motifs are within 34 bp of the DSB site.

Each motif is shown as its predicted stem-loop structure. Base-pairing within the stem is indicated by vertical lines. Loop bases are separated from the stem by a space. Numbers correspond to the length of the stem, the number of bases in the loop and an overall stability score for the stem-loop structure (the higher the number, the more stable the structure).

2955 GCCGGA<sub>t</sub>CCGGCTGCGC TC 17 base stem, (stability score 36)

||||| |

2992 TGGTCTAGGTCGTTGTG CG 4 base loop

2931 CGTGGACGCGGCGG CCATCGACT 14, (30)

|||| |

2976 GCGCTCGCGTCGGC C<sub>t</sub>AGGCCGG 18

2894 CACCGTGACCGCAG AGGTTGAAGCT 14, (29)

| |||| |

2943 GCGGCGCAGGTGCC AACGGGTCGCG 22

2898 GTGACCGCAGAG GTTGAAGCTGCGC 12, (24)

||| |||| | | T

2948 TACCGGCGGCGC AGGTGCCAACGGG 27

2676 GGTAGTGCCTT GTGATCCG 11, (22)

||| ||||| | G

2714 TCACCACGGCA AGTTTAAT 17

2413 CGTTGACGTC AGTGGAGGA 10, (21)

||||||| || C

2451 GTAACTGGAG GCTAGACTA 19

2146 TTTGAACATC CTCTTGCTGCT 10, (21)

||||||| |

2185 AAACCTTGTCG CACTTCGAGT 20

## Reference

Hunter, N., and Kleckner, N. (2001). The single-end invasion: an asymmetric intermediate at the double-strand break to double-holliday junction transition of meiotic recombination. *Cell* 106, 59-70.

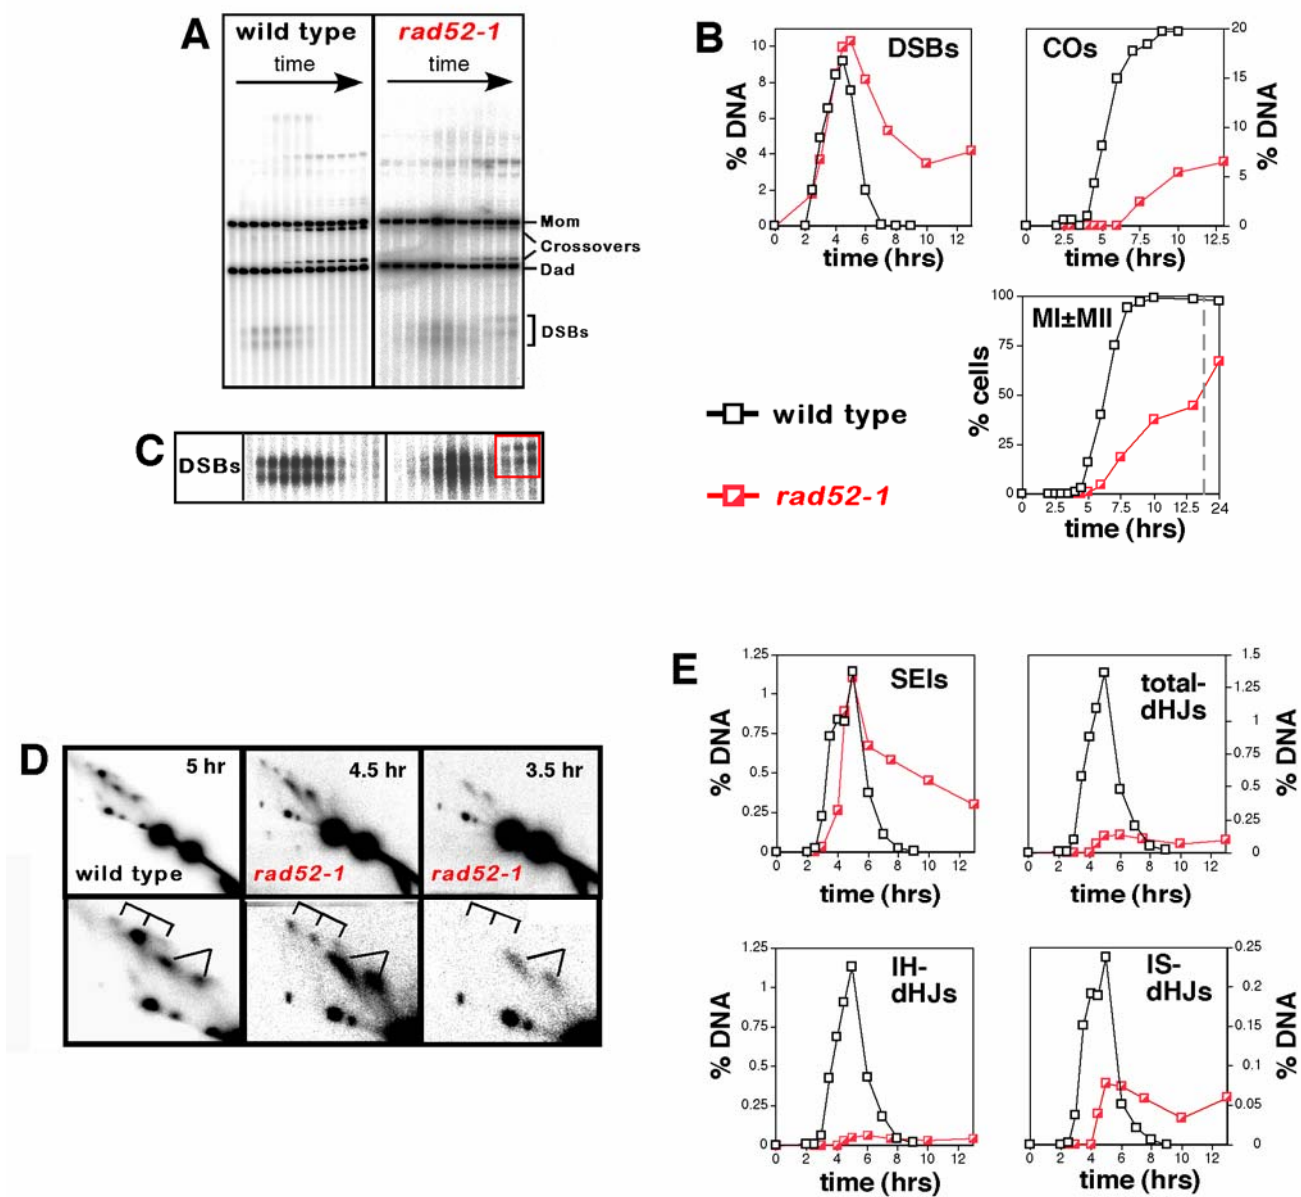

**Figure S3. *rad52-1* mutants are defective for the SEI-to-dHJ transition.**

(A) Images of 1D gels from wild-type and *rad52-1* time course experiments.

(B) Quantitation of DSBs and crossovers (COs), and analysis of meiotic divisions (MI±MII). The dashed grey line marks a break in the X-axis.

(C) Dark exposures of the DSB regions from 1D gels, highlighting the high molecular weight DSB species formed in *rad52-1* cells (see Figure S2).

(D) 2D analysis of JMs. In each case, a representative 2D panel is shown together with a blowup of the JM region. SEI and dHJ species are indicated by forked lines and tridents, respectively. The 3.5 hr time point from *rad52-1* shows SEI formation in the absence of detectable dHJs, a situation that is never observed in wild-type cells.

(E) Quantitation of JM formation.

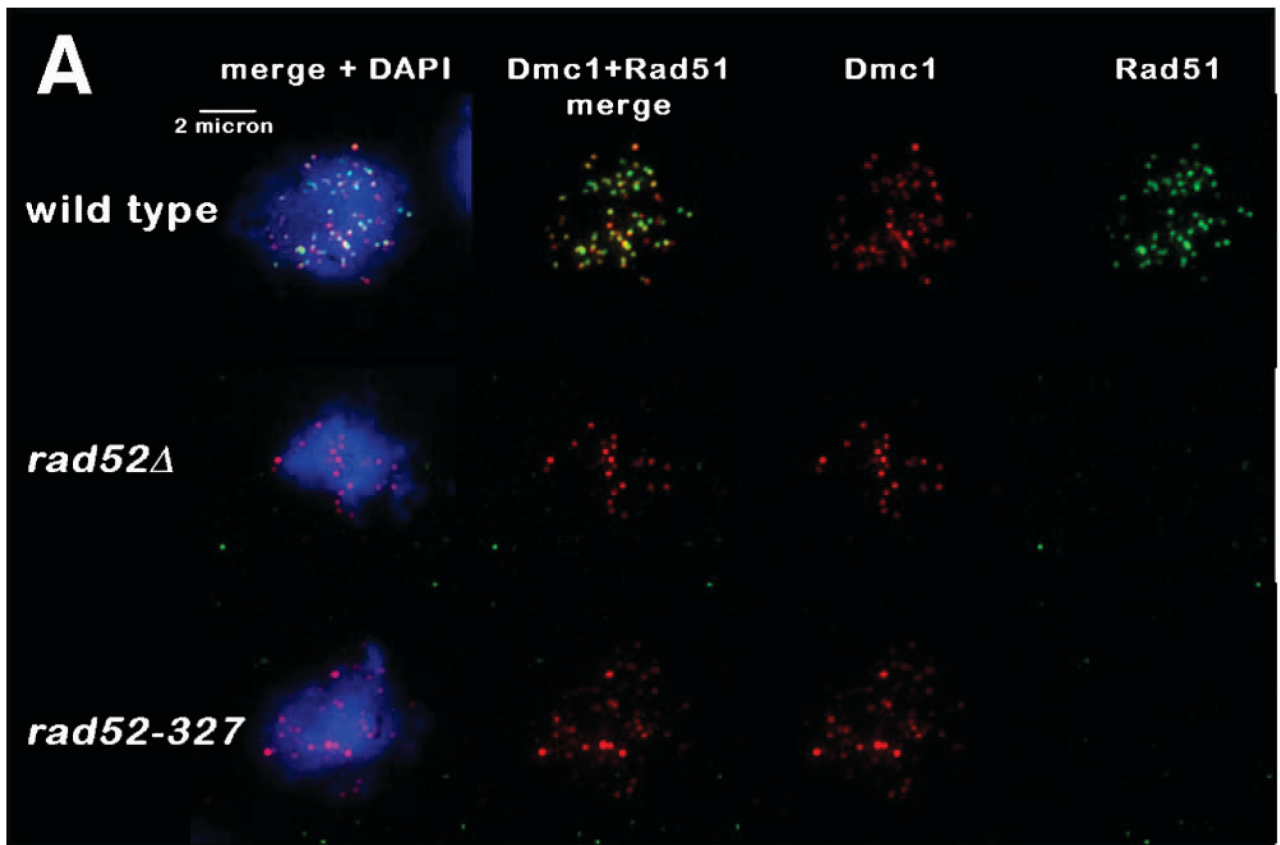

**B**

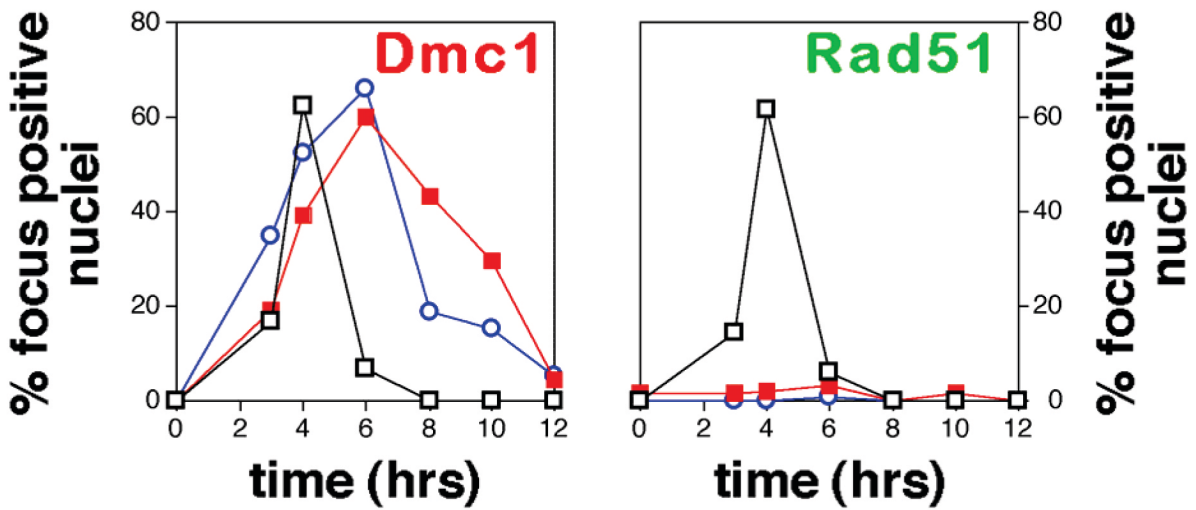

□ wild type    ■ *rad52Δ*    ○ *rad52-327*



**Figure S4. Dmc1 Immunostaining Foci Assemble Along Meiotic Chromosomes Independently of Rad52 Mediator Function.**

(A) Images of spread meiotic nuclei from wild-type, *rad52* $\Delta$  and *rad52-327* cells immunostained with antibodies against Dmc1 (red) and Rad51 (green).

(B) Quantitation of the percentage of focus-positive nuclei (containing greater than five foci) over time.  $\geq 100$  randomly selected nuclei were analyzed for each time point. The average numbers of Dmc1 foci per nucleus were  $38 \pm 10$ ,  $21 \pm 7$  and  $15 \pm 8$  for wild type, *rad52* $\Delta$  and *rad52-327* strains, respectively. Reduced steady-state numbers of Dmc1 foci could reflect inefficient formation or asynchronous assembly of Dmc1 filaments in *rad52* $\Delta$  and *rad52-327* mutants.

**Table S1. Strains used in this study.**

| Strain* | Genotype**                                                                                                                     |
|---------|--------------------------------------------------------------------------------------------------------------------------------|
| NHY452  | <i>MATa/MATa HIS4::LEU2-(Bam)/his4-X::LEU2-(Bam)-URA3 rad52-1/rad52-1</i>                                                      |
| NHY910  | <i>MATa/MATa HIS4::LEU2-(Bam)/his4-X::LEU2-(Bam)-URA3 rad52Δ::URA3/rad52Δ::URA3 dmc1Δ::kanMX4/dmc1Δ::kanMX4</i>                |
| NHY1066 | <i>MATa/MATa HIS4::LEU2-(Bam)/his4-X::LEU2-(Bam)-URA3 rad51Δ::hisG/rad51Δ::hisG dmc1Δ::kanMX4/dmc1Δ::kanMX4</i>                |
| NHY1226 | <i>MATa/MATa HIS4::LEU2-(BamHI)/his4-X::LEU2-(NgoMIV)-URA3 ndt80Δ::kanMX4/ndt80Δ::kanMX4</i>                                   |
| NHY1296 | <i>MATa/MATa HIS4::LEU2-(BamHI)/his4-X::LEU2-(NgoMIV)-URA3</i>                                                                 |
| NHY1698 | <i>MATa/MATa HIS4::LEU2-(BamHI)/his4-X::LEU2-(NgoMIV)-URA3 rad52-327/rad52-327 dmc1Δ::kanMX4/dmc1Δ::kanMX4</i>                 |
| NHY1711 | <i>MATa/MATa HIS4::LEU2-(BamHI)/his4-X::LEU2-(NgoMIV)-URA3 rad52-327/rad52-327</i>                                             |
| NHY1721 | <i>MATa/MATa HIS4::LEU2-(BamHI)/his4-X::LEU2-(NgoMIV)-URA3 rad52Δ::URA3/rad52Δ::URA3</i>                                       |
| NHY1831 | <i>MATa/MATa HIS4::LEU2-(BamHI)/his4-X::LEU2-(NgoMIV)-URA3 msh5Δ::kanMX4/msh5Δ::kanMX4</i>                                     |
| NHY1950 | <i>MATa/MATa HIS4::LEU2-(BamHI)/his4-X::LEU2-(NgoMIV)-URA3 rad52Δ::hphMX4/rad52Δ::hphMX4<br/>msh5Δ::kanMX4/msh5Δ::kanMX4</i>   |
| NHY2556 | <i>MATa/MATa HIS4::LEU2-(BamHI)/his4-X::LEU2-(NgoMIV)-URA3 ndt80Δ::kanMX4/ndt80Δ::kanMX4<br/>rad52Δ::hphMX4/rad52Δ::hphMX4</i> |
| NHY2567 | <i>MATa/MATa HIS4::LEU2-(BamHI)/his4-X::LEU2-(NgoMIV)-URA3 ndt80Δ::kanMX4/ndt80Δ::kanMX4 rad52-327/rad52-327</i>               |

\*All strains are isogenic derivatives of SK1.

\*\*All strains are also homozygous for the mutations *ura3Δ(sma-pst)* and *leu2::hisG*.
